# Supplementary material for: Comparing the Toxicological Responses of Pulmonary Air–Liquid Interface Models upon Exposure to Differentially Treated Carbon Fibers
Source: MDPI journal article supplement (doi:10.3390/ijms24031927), 2023-01-18
Supplement: s1 [file s1]

## Supplementary materials

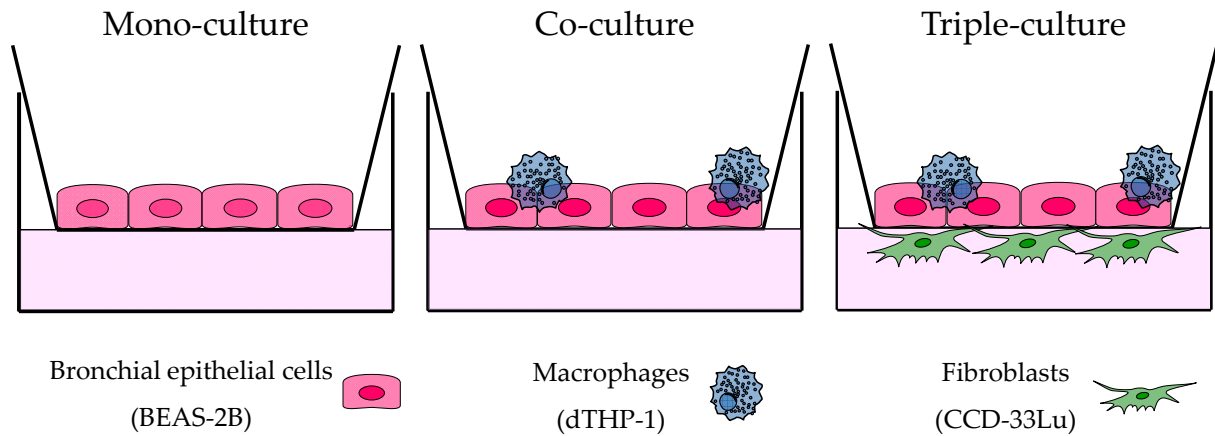

**Figure S1.** Schematic representation of the three cell culture models used for CF exposure experiments. The mono-cultures were composed of the bronchial epithelial cell line BEAS-2B grown in the apical compartment of a Transwell® insert. For a co-culture model, differentiated macrophage-like cells (dTHP-1) were added into the apical compartment. For a triple-culture, fibroblasts were attached to the basolateral side of the Transwell® membranes prior to the seeding of BEAS-2B and dTHP-1 cells.

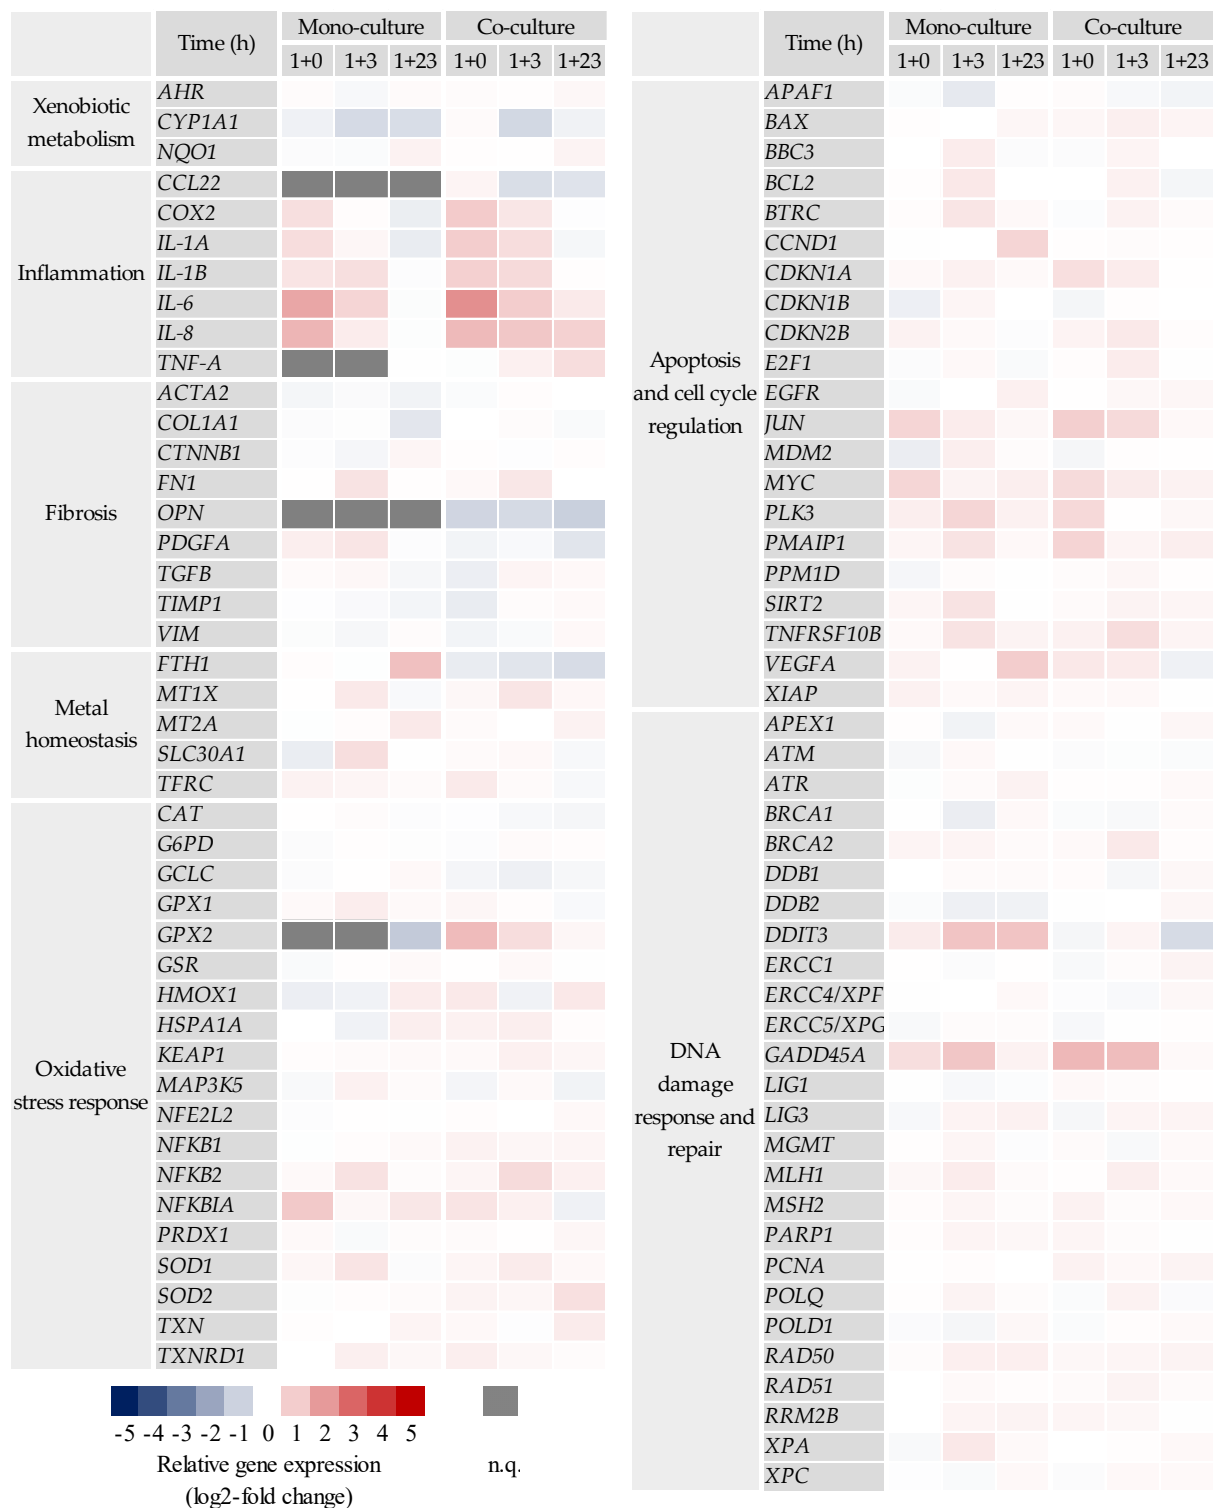

**Figure S2.** Full gene expression profiles of BEAS-2B mono- and BEAS-2B/dTHP-1 co-cultures after exposure to mechanically treated CF. Both cell cultures were exposed to  $7.00 \pm 1.25 \mu\text{g}/\text{cm}^2$  CF for 1 h and post-incubated for 0, 3 or 23 h. The results are depicted as the log2-fold change of the relative gene expression. A red color represents the induction, a blue color the repression of a gene. The means of at least three independent experiments are displayed. n.q.: not quantifiable due to low expression levels.

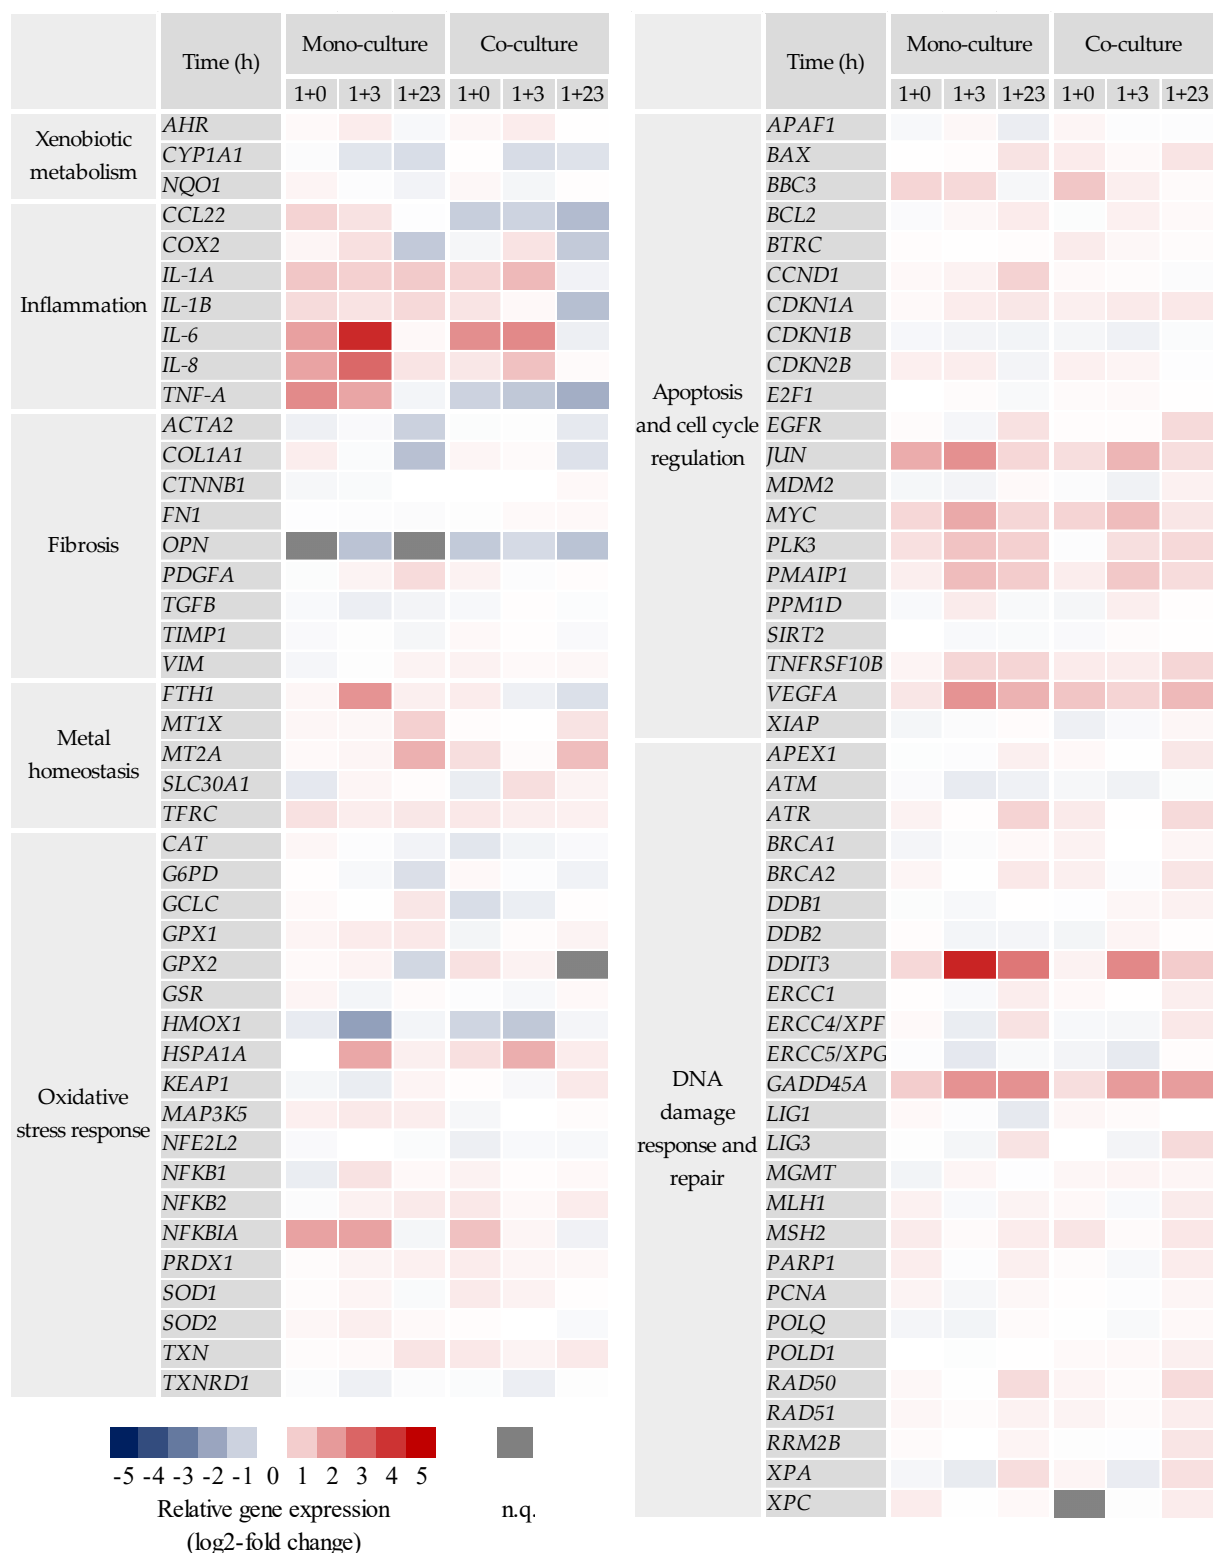

**Figure S3.** Full gene expression profiles of BEAS-2B mono- and BEAS-2B/dTHP-1 co-cultures after exposure to thermo-mechanically treated CF. Both cell cultures were exposed to  $6.55 \pm 1.96 \mu\text{g}/\text{cm}^2$  CF for 1 h and post-incubated for 0, 3 or 23 h. The results are depicted as the log<sub>2</sub>-fold change of the relative gene expression. A red color represents the induction, a blue color the repression of a gene. The means of at least three independent experiments are displayed. n.q.: not quantifiable due to low expression levels.

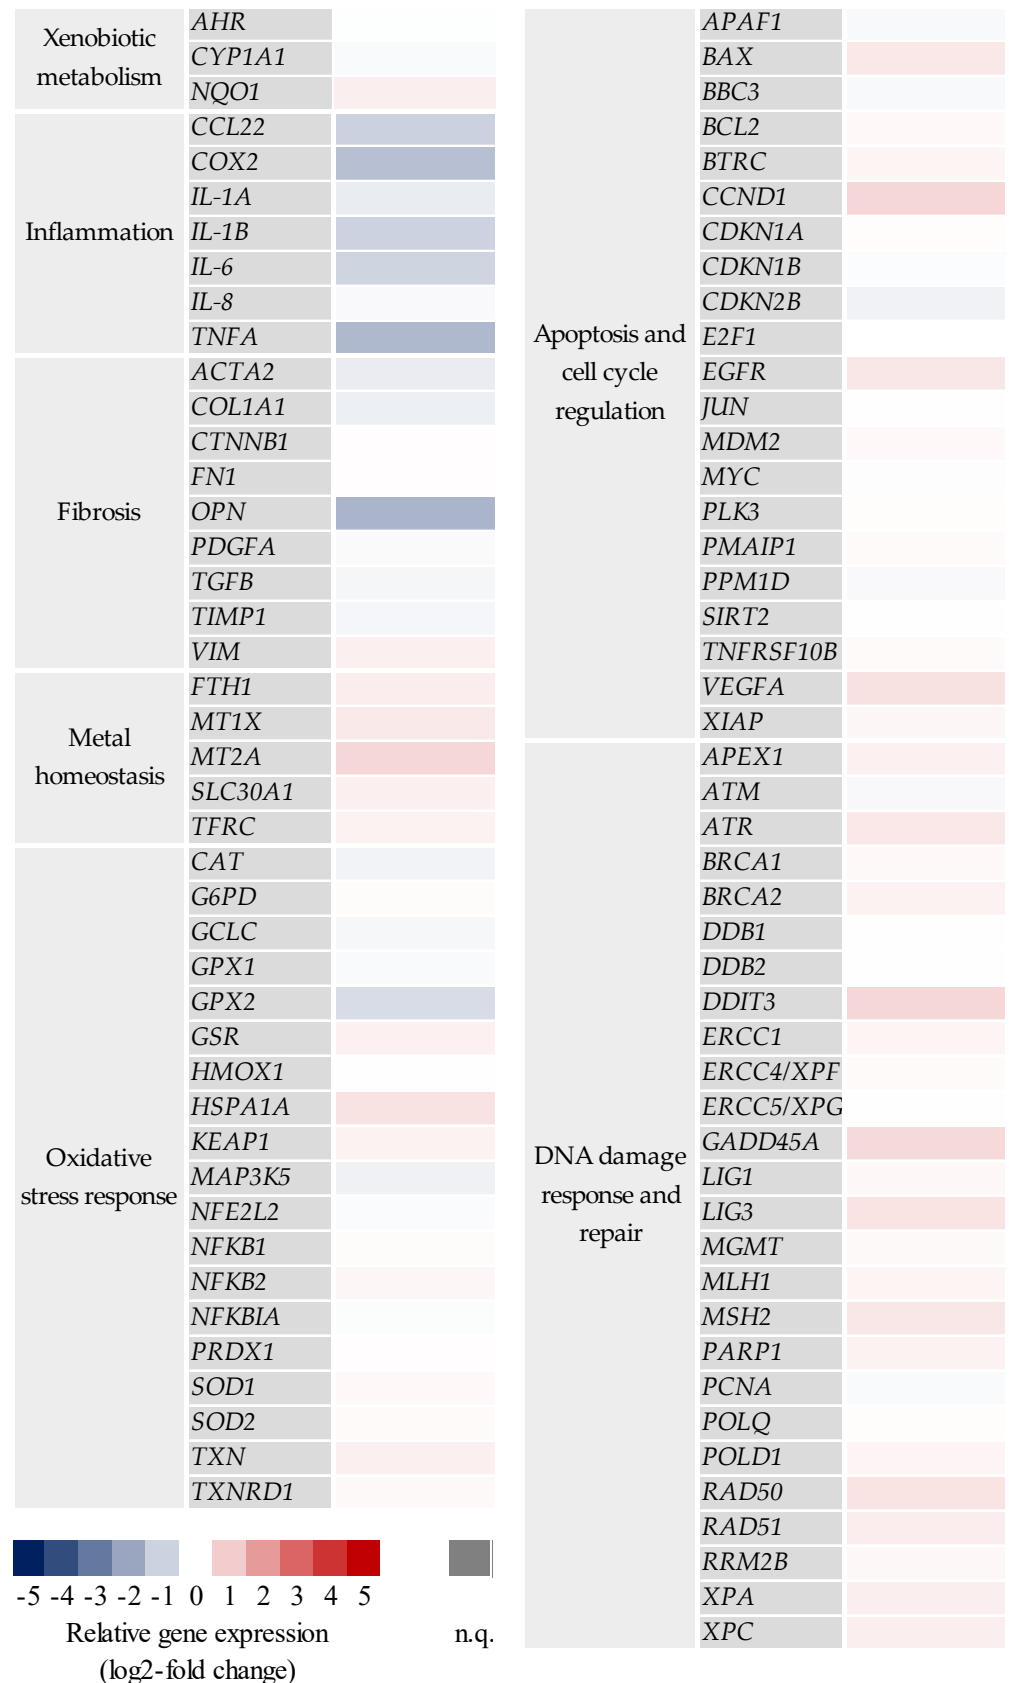

**Figure S4.** Full gene expression profiles of BEAS-2B/dTHP-1/CCD-33Lu triple-cultures after exposure to mechanically treated CF. Triple-cultures were exposed to  $7.00 \pm 1.25 \mu\text{g}/\text{cm}^2$  CF for 1 h and post-incubated for 23 h. The results are depicted as the log2-fold change of the relative gene expression. A red color represents the induction, a blue color the repression of a gene. The means of at least three independent experiments are displayed. n.q.: not quantifiable due to low expression levels.

**Table S1.** Complete list of genes utilized in the HT RT-qPCR with their corresponding proteins.

| Cluster                   | Gene           | Corresponding protein                                                                      |
|---------------------------|----------------|--------------------------------------------------------------------------------------------|
| Xenobiotic metabolism     | <i>AHR</i>     | aryl hydrocarbon receptor                                                                  |
|                           | <i>CYP1A1</i>  | cytochrome P450, family 1, subfamily A, polypeptide 1 (CYP1A1)                             |
|                           | <i>NQO1</i>    | NAD(P)H dehydrogenase, quinone 1 (NQO1)                                                    |
| Inflammation              | <i>CCL22</i>   | C-C motif chemokine 22 (CCL22)                                                             |
|                           | <i>COX2</i>    | prostaglandin-endoperoxide synthase 2 (PTGS2)/ cyclooxygenase-2 (COX-2)                    |
|                           | <i>IL-1A</i>   | interleukin-1 $\alpha$ (IL-1 $\alpha$ )                                                    |
|                           | <i>IL-1B</i>   | interleukin-1 $\beta$ (IL-1 $\beta$ )                                                      |
|                           | <i>IL-6</i>    | interleukin-6 (IL-6)                                                                       |
|                           | <i>IL-8</i>    | interleukin-8 (IL-8)                                                                       |
|                           | <i>TNF-A</i>   | tumor necrosis factor $\alpha$ (TNF- $\alpha$ )                                            |
| Fibrosis                  | <i>ACTA2</i>   | alpha smooth muscle actin ( $\alpha$ -SMA)                                                 |
|                           | <i>COL1A1</i>  | collagen, type I, alpha 1 (COL1A1)                                                         |
|                           | <i>CTNNB1</i>  | $\beta$ -catenin (CTNNB)                                                                   |
|                           | <i>FN1</i>     | fibronectin1 (FN1)                                                                         |
|                           | <i>OPN</i>     | osteopontin (OPN)                                                                          |
|                           | <i>PDGFA</i>   | platelet-derived growth factor subunit A (PDGF-A)                                          |
|                           | <i>TGFB</i>    | transforming growth factor $\beta$ (TGF- $\beta$ )                                         |
|                           | <i>TIMP1</i>   | tissue inhibitor of metalloproteinase (TIMP1)                                              |
|                           | <i>VIM</i>     | vimentin (VIM)                                                                             |
| Metal homeostasis         | <i>FTH1</i>    | ferritin, heavy polypeptide 1 (FTH1)                                                       |
|                           | <i>MT1X</i>    | metallothionein 1X (MT1X)                                                                  |
|                           | <i>MT2A</i>    | metallothionein 2A (MT2A)                                                                  |
|                           | <i>SLC30A1</i> | solute carrier family 30 (zinc transporter), member 1 (ZnT1)                               |
|                           | <i>TFRC</i>    | transferrin receptor (TFR)                                                                 |
| Oxidative stress response | <i>CAT</i>     | catalase (CAT)                                                                             |
|                           | <i>G6PD</i>    | glucose-6-phosphate dehydrogenase (G6PD)                                                   |
|                           | <i>GCLC</i>    | glutamate-cysteine ligase, catalytic subunit (GCL)                                         |
|                           | <i>GPX1</i>    | glutathione peroxidase 1 (GPX1)                                                            |
|                           | <i>GPX2</i>    | glutathione peroxidase 2 (GPX2)                                                            |
|                           | <i>GSR</i>     | glutathione reductase (GSR)                                                                |
|                           | <i>HMOX1</i>   | heme oxygenase (decycling) 1 (HO1)                                                         |
|                           | <i>HSPA1A</i>  | heat shock 70kDa protein 1A (hsp70)                                                        |
|                           | <i>KEAP1</i>   | kelch-like ECH-associated protein 1 (Keap1)                                                |
|                           | <i>MAP3K5</i>  | mitogen-activated protein kinase kinase kinase 5 (MAP3K5/ASK1)                             |
|                           | <i>NFE2L2</i>  | nuclear factor, erythroid 2-like 2 (Nrf2)                                                  |
|                           | <i>NFKB1</i>   | nuclear factor of kappa light polypeptide gene enhancer in B-cells 1 (p50/p105)            |
|                           | <i>NFKB2</i>   | nuclear factor of kappa light polypeptide gene enhancer in B-cells 2 (p49/p100)            |
|                           | <i>NFKBIA</i>  | nuclear factor of kappa light polypeptide gene enhancer in B-cells inhibitor, alpha (IKBA) |
|                           | <i>PRDX1</i>   | peroxiredoxin 1 (Prx1)                                                                     |
|                           | <i>SOD1</i>    | superoxide dismutase 1, soluble (SOD1)                                                     |
|                           | <i>SOD2</i>    | superoxide dismutase 2, mitochondrial (SOD2/MnSOD)                                         |

|                                             |           |                                                                                    |
|---------------------------------------------|-----------|------------------------------------------------------------------------------------|
|                                             | TXN       | thioredoxin (Txr)                                                                  |
|                                             | TXNRD1    | thioredoxin reductase 1 (TxrR)                                                     |
| Apoptosis and<br>cell cycle regu-<br>lation | APAF1     | apoptotic protease activating factor (APAF1)                                       |
|                                             | BAX       | bcl2-associated x protein (bax)                                                    |
|                                             | BBC3      | p53 up-regulated modulator of apoptosis (PUMA)                                     |
|                                             | BCL2      | b-cell cll/lymphoma 2 (bcl-2)                                                      |
|                                             | BTRC      | transducin repeat containing E3 ubiquitin protein ligase,<br>beta ( $\beta$ -TrCP) |
|                                             | CCND1     | cyclin D1 (CCND1)                                                                  |
|                                             | CDKN1A    | cyclin-dependent kinase inhibitor 1A (p21)                                         |
|                                             | CDKN1B    | cyclin-dependent kinase inhibitor 1B (p27)                                         |
|                                             | CDKN2B    | cyclin-dependent kinase inhibitor 2B (p15)                                         |
|                                             | E2F1      | E2F transcription factor 1 (E2F1)                                                  |
|                                             | EGFR      | epidermal growth factor receptor (EGFR)                                            |
|                                             | JUN       | jun proto-oncogene (c-jun)                                                         |
|                                             | MDM2      | Mouse double minute 2 hom. proto-onco-gene, E3 ubiquitin<br>protein ligase (Mdm2)  |
|                                             | MYC       | v-myc avian myelocytomatosis viral oncogene homolog (c-<br>myc)                    |
|                                             | PLK3      | polo-like kinase 3 (PLK3)                                                          |
|                                             | PMAIP1    | phorbol-12-myristate-13-acetate-induced protein 1 (Noxa)                           |
|                                             | PPM1D     | protein phosphatase, mg2+/Mn2+ dependent, 1D (PPM1D)                               |
|                                             | SIRT2     | sirtuin 2 (SIRT2)                                                                  |
|                                             | TNFRSF10B | tumor necrosis factor receptor superfamily, member 10b<br>(DR5)                    |
|                                             | VEGFA     | vascular endothelial growth factor A (VEGFA)                                       |
|                                             | XIAP      | X-linked inhibitor of apoptosis (XIAP)                                             |
| DNA damage<br>response and<br>repair        | APEX1     | apurinic-apyrimidinic endonuclease 1 (APEX1/Ref-1)                                 |
|                                             | ATM       | ataxia telangiectasia mutated (ATM)                                                |
|                                             | ATR       | ataxia telangiectasia and Rad3-related protein (ATR)                               |
|                                             | BRCA1     | breast cancer 1, early onset (BRCA1)                                               |
|                                             | BRCA2     | breast cancer 2, early onset (BRCA2)                                               |
|                                             | DDB1      | damage-specific DNA binding protein 1 (DDB1)                                       |
|                                             | DDB2      | damage-specific DNA binding protein 2 (DDB2)                                       |
|                                             | DDIT3     | growth arrest and DNA damage-inducible protein<br>(GADD153)                        |
|                                             | ERCC1     | excision repair cross-complementation group 1 (ERCC1)                              |
|                                             | ERCC4/XPF | excision repair cross-complementation group 4 (XPF)                                |
|                                             | ERCC5/XPG | excision repair cross-complementation group 5 (XPG)                                |
|                                             | GADD45A   | growth arrest and DNA-damage-inducible, alpha<br>(GADD45A)                         |
|                                             | LIG1      | ligase I, DNA, ATP-dependent (LIG1)                                                |
|                                             | LIG3      | ligase III, DNA, ATP-dependent (LIG3)                                              |
|                                             | MGMT      | O-6-methylguanine-DNA methyltransferase (MGMT)                                     |
|                                             | MLH1      | mutL homolog 1 (MLH1)                                                              |
|                                             | MSH2      | mutS homolog 2 (MSH2)                                                              |
|                                             | PARP1     | Poly (ADP-ribose) polymerase 1 (PARP1)                                             |
|                                             | PCNA      | proliferating cell nuclear antigen (PCNA)                                          |
|                                             | POLB      | polymerase (DNA directed), beta (POLB)                                             |

|              |                                                        |
|--------------|--------------------------------------------------------|
| <i>POLQ</i>  |                                                        |
| <i>RAD50</i> | RAD50 homolog ( <i>S. cerevisiae</i> ) (RAD50)         |
| <i>RAD51</i> | RAD51 recombinase (RAD51)                              |
| <i>RRM2B</i> | ribonucleotide reductase M2 B (TP53 inducible) (p53R2) |
| <i>XPA</i>   | xeroderma pigmentosum, complementation group A (XPA)   |
| <i>XPC</i>   | xeroderma pigmentosum, complementation group C (XPC)   |

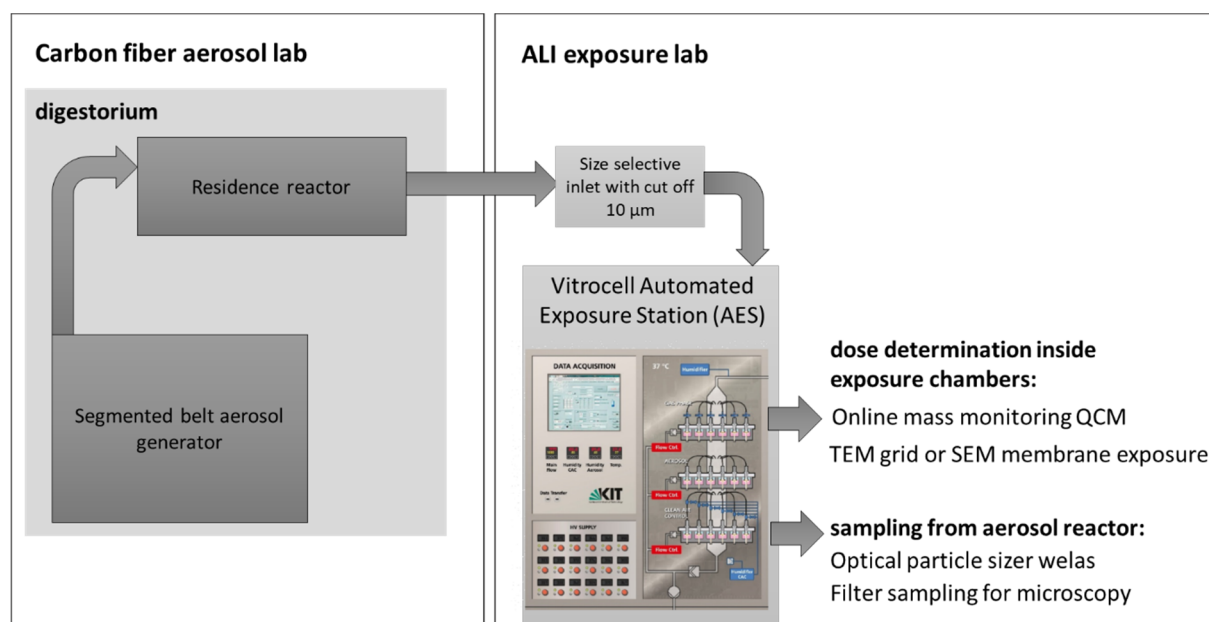

**Figure S5.** Schematic representation of the setup for ALI exposure studies. In the carbon fibre aerosol lab the CF were dispersed by the segmented belt aerosol generator and after passing the residence reactor the CF aerosol is brought to the air-liquid interface (ALI) exposure lab where the Vitrocell AES is located. QCM = quartz crystal microbalance, SEM = scanning electron microscopy, TEM = transmission electron microscopy.

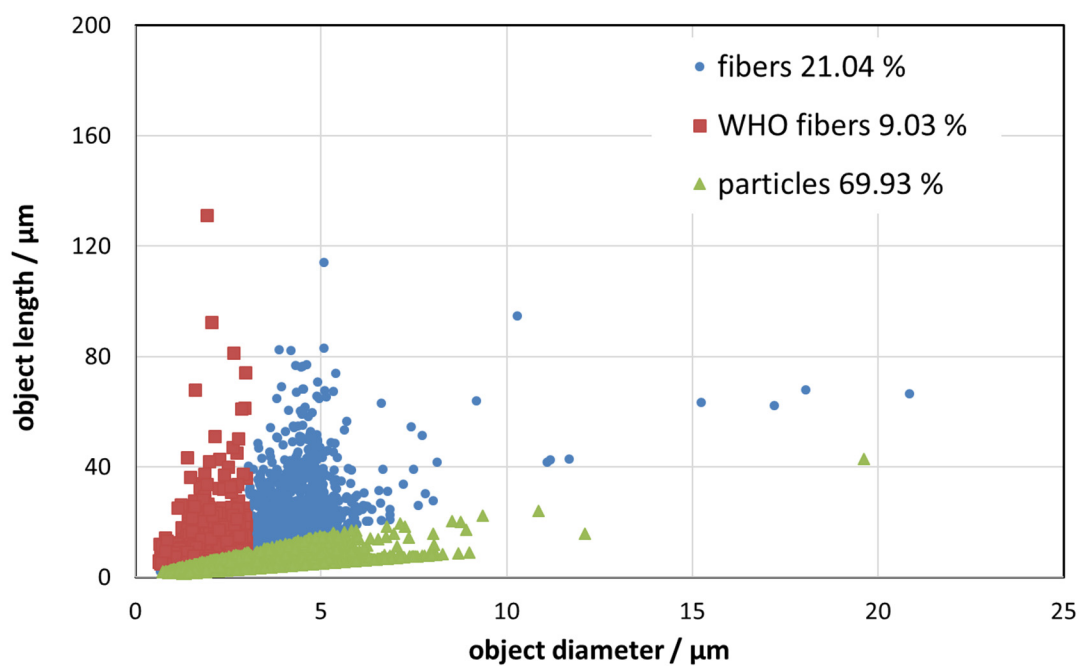

**Figure S6.** Representative single object analysis of a CF sample subjected to thermal-mechanical treatment. The color code indicates the classification of an object as particle (green triangle), fiber (blue dot) and WHO fiber (red square) dependent on the geometric properties length and diameter.
